# Supplementary material for: Traditional bullying and cyberbullying in the digital age and its associated mental health problems in children and adolescents: a meta-analysis
Source: PubMed Central journal article supplement (PMC11424704; doi:10.1007/s00787-022-02128-x), 2022-12-31
Supplement: 787_2022_2128_MOESM1_ESM.pdf [file 787_2022_2128_MOESM1_ESM.pdf]

| Author/Date               | Country                                                                                    | Study Design | Site of data collection                             | Sample size | Gender (% Female) | Mean Age (SD) OR Range (yrs) | Traditional bullying measure | Cyberbullying measure | SI measure  | SA measure  | Self-harm measure | Depression measure | Anxiety measure | Self-Esteem measure | Other Mental health measure | Quality rating |
|---------------------------|--------------------------------------------------------------------------------------------|--------------|-----------------------------------------------------|-------------|-------------------|------------------------------|------------------------------|-----------------------|-------------|-------------|-------------------|--------------------|-----------------|---------------------|-----------------------------|----------------|
| Benatov et al. 2021       | Israel                                                                                     | LS           | 9 <sup>th</sup> to 12 <sup>th</sup> grade students  | 2150        | 21.3%             | 15.42 (0.97)                 | Single item                  | Single item           | PSS         | PSS         | \                 | BSI                | \               | \                   | \                           | Fair           |
| DeSmet et al. 2021        | Belgium                                                                                    | CS           | 7 <sup>th</sup> to 12 <sup>th</sup> grade students  | 1037        | 50.0%             | 15.2 (1.9)                   | Single item                  | Single item           | DASS-21     | DASS-21     |                   | DASS-21            | DASS-21         |                     | DASS-21                     | Good           |
| Eyuboglu et al. 2021      | Turkey                                                                                     | CS           | 6 <sup>th</sup> to 12 <sup>th</sup> grade students  | 6202        | 46.0%             | 14.4 (1.9)                   | YRBSS                        | YRBSS                 | \           | \           | YRBSS             | HADS               | HADS            | RSES                | SDQ                         | Good           |
| Coyle et al.2021          | USA                                                                                        | CS           | 7 <sup>th</sup> to 8 <sup>th</sup> grade students   | 799         | 48.2%             | Not stated                   | MCVS                         | MCVS                  | \           | \           | \                 | BASC-2             | BASC-2          | \                   | BASC-2                      | Good           |
| EACHMS Group 2021         | Japan, Greece, Norway, India, Finland, Vietnam, Israel, Iran, Lithuania, Russia, Indonesia | CS           | Not stated                                          | 21688       | 47.3-54.7%        | Range 13-15                  | Single item                  | Single item           | \           | \           | \                 | \                  | \               | \                   | SDQ                         | Good           |
| Peng et al. 2020          | China                                                                                      | CS           | 7 <sup>th</sup> to 12 <sup>th</sup> grade students  | 4241        | 44.2%             | 14.36 (1.8)                  | JCVQ                         | JCVQ                  | JCVQ        | JCVQ        | JCVQ              | \                  | \               | \                   | K-10                        | Good           |
| Nagamitsu et al.2020      | Japan                                                                                      | CS           | 7 <sup>th</sup> to 9 <sup>th</sup> grade students   | 22419       | 48.0%             | Range 13-18                  | Single item                  | Single item           | Single item | Single item | \                 | \                  | \               | \                   | Single item                 | Poor           |
| Islam et al.2020          | Australia                                                                                  | CS           | 7 <sup>th</sup> to 12 <sup>th</sup> grade students  | 2166        | 47.8%             | 14.83 (1.7)                  | YRBSS                        | YRBSS                 | YRBSS       | YRBSS       | YRBSS             | DISC IV            | DISC IV         | \                   | DISC IV                     | Good           |
| Sibold et al.2020         | USA                                                                                        | CS           | 9 <sup>th</sup> to 12 <sup>th</sup> grade students  | 29207       | Not stated        | Range 14-18                  | YRBSS                        | YRBSS                 | YRBSS       | YRBSS       | \                 | \                  | \               | \                   | YRBSS                       | Poor           |
| Garaigordobil et al. 2020 | Spain                                                                                      | CS           | 7 <sup>th</sup> to 12 <sup>th</sup> grade students  | 1748        | 52.6%             | Range 13-17                  | SPH                          | \                     | \           | \           | \                 | BDI-II             | SAS-A           | \                   | SCL-90R                     | Fair           |
| Baiden et al. 2020        | USA                                                                                        | CS           | 9 <sup>th</sup> to 12 <sup>th</sup> grade students  | 14603       | 52.0%             | Range 14-18                  | YRBSS                        | YRBSS                 | YRBSS       | YRBSS       | \                 | YRBSS              | \               | \                   | YRBSS                       | Good           |
| Azami et al.2020          | Iran                                                                                       | CS           | Not stated                                          | 425         | 53.2%             | 16.61 (0.95)                 | OB/VQ                        | E-VS                  | \           | Single item | Single item       | \                  | \               | \                   | Single item                 | Fair           |
| Peng et al.2019           | China                                                                                      | CS           | 7 <sup>th</sup> to 9 <sup>th</sup> grade students   | 2647        | 51.2%             | 13.6 (1.1)                   | Single-item                  | Single-item           | Single-item | Single-item | Single-item       | \                  | \               | \                   | SDQ                         | Good           |
| Khong et al. 2020         | Singapore                                                                                  | CS           | 7 <sup>th</sup> to 11 <sup>th</sup> grade students  | 3329        | 49.8%             | 14.4 (1.5)                   | Single-item                  | Single-item           | \           | \           | \                 | \                  | \               | \                   | SDQ                         | Good           |
| Kim et al. 2019           | Canada                                                                                     | CS           | 7 <sup>th</sup> to 12 <sup>th</sup> grade students  | 4940        | 56.7%             | 15.19 (1.8)                  | Single-item                  | Single-item           | Single-item | \           | \                 | Single-item        | Single-item     | \                   | Single-item                 | Good           |
| Zaborskis et al. 2019     | Israel, Lithuania, Luxembourg                                                              | CS           | 7 <sup>th</sup> to 12 <sup>th</sup> grade students  | 3814        | 47.7-54.7%        | Range 15-16                  | Single-item                  | Single-item           | YRBSS       | \           | YRBSS             | \                  | \               | \                   | \                           | Good           |
| Hinduja et al.2019        | USA                                                                                        | CS           | 7 <sup>th</sup> to 12 <sup>th</sup> grade students  | 2670        | 49.9%             | 14.5                         | Multi-item                   | Multi-item            | NASHS       | NASHS       | \                 | \                  | \               | \                   | \                           | Good           |
| Lucas et al.2018          | Spain                                                                                      | CS           | Not stated                                          | 1664        | 53.0%             | 16.12 (1.36)                 | BCB                          | BCB                   | PSS         | PSS         | \                 | \                  | \               | \                   | \                           | Fair           |
| Han et al. 2018           | China                                                                                      | CS           | 4 <sup>th</sup> to 12 <sup>th</sup> grade students  | 3675        | 51.8%             | 13.6 (2.5)                   | SSCS                         | SSCS                  | YRBSS       | YRBSS       | \                 | \                  | \               | \                   | \                           | Fair           |
| Fredrick et al. 2018      | USA                                                                                        | CS           | 9 <sup>th</sup> grade students                      | 403         | 50.0%             | 14.5 (0.5)                   | OB/VQ                        | CBVS                  | SIQ-JR      | \           | \                 | CDI-2              | \               | \                   | \                           | Good           |
| Kim et al.2018            | Canada                                                                                     | CS           | 6 <sup>th</sup> to 12 <sup>th</sup> grade students  | 31148       | 51.9%             | 13.52 (2.04)                 | OMESS                        | OMESS                 | \           | \           | \                 | \                  | \               | \                   | EPS                         | Good           |
| William et al. 2017       | USA                                                                                        | CS           | 9 <sup>th</sup> to 12 <sup>th</sup> grade students  | 233         | 55.0%             | 14.5 (0.5)                   | BS                           | Single-item           | Single-item | Single-item | \                 | CSD-10             | \               | \                   | \                           | Fair           |
| Wolke et al. 2017         | UK                                                                                         | CS           | Not stated                                          | 2745        | 56.9%             | 13.5 (1.35)                  | BFI                          | BFI                   | \           | \           | \                 | \                  | \               | SDQ                 | SDQ                         | Good           |
| Tural et al. 2017         | Turkey                                                                                     | CS           | Not stated                                          | 1276        | 49.3%             | Not stated                   | PBR5-AF                      | CBS                   | \           | \           | \                 | BSI                | BSI             | \                   | \                           | Fair           |
| Hébert et al.2016         | Canada                                                                                     | LS           | 10 <sup>th</sup> to 12 <sup>th</sup> grade students | 8194        | 57.8%             | Range 14-18                  | Single-item                  | Single-item           | Single-item | \           | \                 | \                  | \               | SDQ                 | K-10                        | Good           |
| You et al. 2016           | South Korea                                                                                | CS           | 7 <sup>th</sup> to 9 <sup>th</sup> grade students   | 1347        | 48.5%             | Not stated                   | CBVS                         | CBVS                  | \           | \           | \                 | CES-D              | \               | SES                 | \                           | Poor           |
| Cross et al. 2015         | Australia                                                                                  | LS           | 8 <sup>th</sup> grade students                      | 1504        | 53.0%             | Range 13-15                  | OB/VQ                        | OB/VO                 | \           | \           | \                 | Single-item        | \               | \                   | SDQ                         | Fair           |
| Hemphill et al. 2015      | Australia                                                                                  | LS           | 9 <sup>th</sup> to 11 <sup>th</sup> grade students  | 927         | 54.0%             | 15.1 (0.4)                   | Multi-item                   | Multi-item            | \           | \           | Single-item       | SMFQ               | \               | \                   | \                           | Good           |
| Elgar et al. 2014         | USA                                                                                        | CS           | 7 <sup>th</sup> to 12 <sup>th</sup> grade students  | 18834       | 50.7%             | 15 (1.7)                     | UIAS                         | UIAS                  | UIAS        | UIAS        | UIAS              | UIAS               | UIAS            | UIAS                | \                           | Good           |
| Messias et al. 2014       | USA                                                                                        | CS           | 9 <sup>th</sup> to 12 <sup>th</sup> grade students  | 15425       | Not stated        | Range 12-18                  | YRBSS                        | YRBSS                 | YRBSS       | YRBSS       | YRBSS             | \                  | \               | \                   | \                           | Fair           |
| Bannik et al. 2014        | Netherlands                                                                                | LS           | 7 <sup>th</sup> grade students                      | 3181        | 49.0%             | 12.5 (0.62)                  | Single-item                  | Single-item           | Single-item | \           | \                 | \                  | \               | \                   | SDQ                         | Poor           |
| Landstedt et al. 2014     | Sweden                                                                                     | CS           | 7 <sup>th</sup> to 9 <sup>th</sup> grade students   | 1214        | 52.7%             | Range 13-16                  | Single-item                  | Single-item           | \           | \           | \                 | CES-D              | \               | \                   | \                           | Fair           |
| Smokowski et al. 2014     | USA                                                                                        | LS           | 6 <sup>th</sup> to 8 <sup>th</sup> grade students   | 3127        | 52.2%             | 12.7                         | SSP+                         | SSP+                  | \           | \           | \                 | YSR                | YSR             | YSR                 | YSR                         | Poor           |
| Sampasa et al. 2014       | Canada                                                                                     | CS           | 7 <sup>th</sup> to 12 <sup>th</sup> grade students  | 3509        | 54.9%             | 14.5 (1.8)                   | Single-item                  | Single-item           | YRBSS       | YRBSS       | \                 | YRBSS              | \               | \                   | \                           | Good           |
| Bonanno et al. 2013       | Canada                                                                                     | CS           | 8 <sup>th</sup> to 10 <sup>th</sup> grade students  | 399         | 57.1%             | 14.2 (0.91)                  | OB/VQ                        | OB/VO                 | SIQ-JR      | SIQ-JR      | SIQ-JR            | CES-D              | \               | \                   | \                           | Good           |
| Litwiller et al. 2013     | USA                                                                                        | CS           | Not stated                                          | 4693        | 47.0%             | 16.11 (1.2)                  | YRBSS                        | YRBSS                 | YRBSS       | YRBSS       | YRBSS             | \                  | \               | \                   | YRBSS                       | Good           |
| Chang et al. 2013         | Taiwan                                                                                     | CS           | 10 <sup>th</sup> grade students                     | 2992        | 48.0%             | Not stated                   | YRBSS                        | YRBSS                 | \           | \           | \                 | CES-D              | \               | \                   | RSS                         | Fair           |
| Ortega et al.2012         | Spain, UK, Italy                                                                           | CS           | Not stated                                          | 5862        | 48.8%             | 14.2 (1.77)                  | DAPHNE                       | DAPHNE                | \           | \           | \                 | \                  | \               | \                   | DAPHNE                      | Good           |
| Beckman et al. 2012       | Sweden                                                                                     | CS           | 7 <sup>th</sup> to 9 <sup>th</sup> grade students   | 3820        | 51.1%             | Range 13-16                  | OB/VQ                        | OB/VO                 | \           | \           | \                 | \                  | \               | \                   | PSP                         | Good           |
| Schneider et al.2012      | USA                                                                                        | CS           | 9 <sup>th</sup> to 12 <sup>th</sup> grade students  | 20406       | 50.4%             | Not stated                   | YRBSS                        | YRBSS                 | YRBSS       | YRBSS       | YRBSS             | YRBSS              | \               | \                   | \                           | Good           |
| Wang et al. 2010          | USA                                                                                        | CS           | 6 <sup>th</sup> to 10 <sup>th</sup> grade students  | 7475        | 51.5%             | 14.2 (1.42)                  | OB/VQ                        | OB/VO                 | \           | \           | Single-item       | Multi-item         | \               | \                   | \                           | Fair           |
| Hinduja et al.2010        | USA                                                                                        | CS           | 6 <sup>th</sup> to 8 <sup>th</sup> grade students   | 1963        | 50.1%             | 12.8 (1.12)                  | Multi-item                   | Multi-item            | NASHS       | NASHS       | \                 | \                  | \               | \                   | \                           | Good           |

% = percent; yrs = years; SI = suicide ideation; SA = suicide attempt; LS = Longitudinal study; CS = Cross-sectional study  
YRBSS = Youth Risk Behavior Surveillance System; JCVQ = The Juvenile Campus Violence Questionnaire; DISC-IV = Diagnostic interview schedule for children- version IV; PSS = Paykal Suicide Scale; BSI = Brief Symptom Inventory; SPH = Screening of Peer Harassment; BDI-II = Beck Depression Inventory-II; SAS-A = Social Anxiety Scale for adolescent; SCL-90-R = 90-Symptom Checklist- Revised; DASS-21 = Depression, Anxiety, Stress scale; SDQ = Strength and Difficulties Questionnaire; RSES = Rosenberg Self-Esteem Scale; MCVS = The Multi-Construct Victim Survey; BASC-2 = The Behavior Assessment System for Children, Second Edition; K-10 = 10-item Kessler Psychological Distress Scale; E-VS = E- victimisation scale; OB/VQ = Revised Olweus Bully/Victim Questionnaire; NASHS = National Adolescent Student Health Survey; BCB = Brief cyberbullying questionnaire; SSCS = School Survey on Crime and Safety; CBVS = Cyberbullying and Victimization Survey; CDI-2 = Children's Depression Inventory 2nd Edition Short Version; SIQ-JR = Suicidal Ideation Questionnaire-Junior; OMESS = Ontario Ministry of Education's Safe Schools Survey; EPS = Emotional Problems Scale; BS = Bully Survey; CESD-10 = Centers for Epidemiological Studies Depression Survey-10; BFI = Bullying and Friendship Interview schedule; CES-D = Centre for Epidemiologic Studies 20-Item Depression Scale (CES-D); SMFQ = Short Mood and Feelings Questionnaire; GBS = Gatehouse Bullying Scale; SMFQ = Short Mood and Feelings Questionnaire; RSS = Rosenberg self-esteem scale; UIAS = The Bullying and Victimization subscales of the University of Illinois Aggression Scales; SSP+ = School Success Profile; YSR = Youth Self-Report(Achenbach and Ruffle's 2000); DAPHNE = DAPHNE Questionnaire (Genta et al., 2012); PSP = PsychoSomatic Problems scale; CBVS = California Bullying Victimization Scale; SES = Self-Esteem Scale, PBR5-AF = Peer Bullying Rating Scale Adolescent Form, CBS = cyber bullying scale; BSI = Brief Symptom Inventory
